# Supplementary material for: Detection of nitroaromatic explosives using π-electron rich luminescent polymeric nanocomposites
Source: Royal Society of Chemistry journal article supplement (doi:10.1039/c5ra20347c), 2015-12-22
Supplement: c5ra20347c1.pdf [file c5ra20347c1.pdf]

## Detection of nitroaromatic explosives using $\pi$ - electron rich luminescent polymeric nanocomposites

Priyanka Dutta, Sudesna Chakravarty, Neelotpal Sen Sarma\*

*Advanced Materials Laboratory, Physical Sciences Division, Institute of Advanced Study in  
Science and Technology, Paschim Boragaon, Guwahati – 781 035, India*

\*Corresponding author, E-mail: neelot@iasst.gov.in

Tel No. +91 361 2912073. Fax: +91 361 2279909.

### Supplementary Information:

#### Structures

The structures of the nitroaromatic compounds used in this study are given in Chart 1.

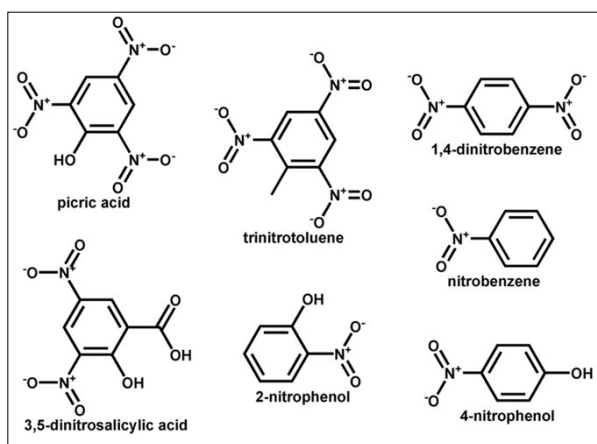

*Chart 1: Structures of the nitroaromatic compounds used.*

#### FT-IR spectrum

The FT-IR spectra of the polymers are provided in Fig. S1.

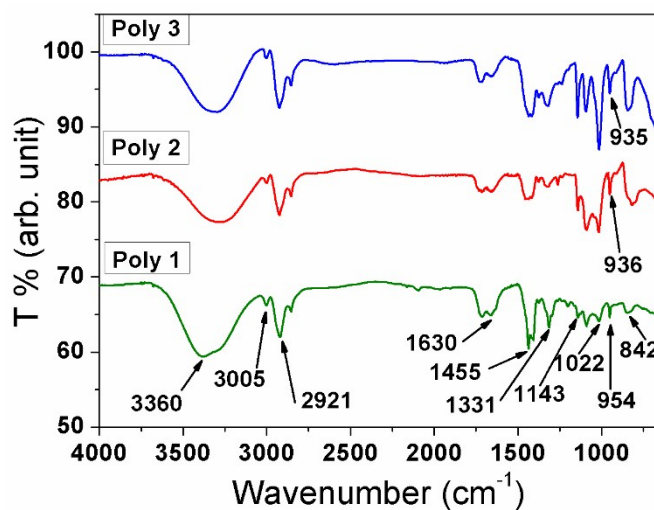

**Fig. S1** FT-IR spectrum of the polymers

### **<sup>1</sup>H-NMR spectrum**

The <sup>1</sup>H-NMR spectra of the parent polymer, Poly 1, is given in Fig. S2.

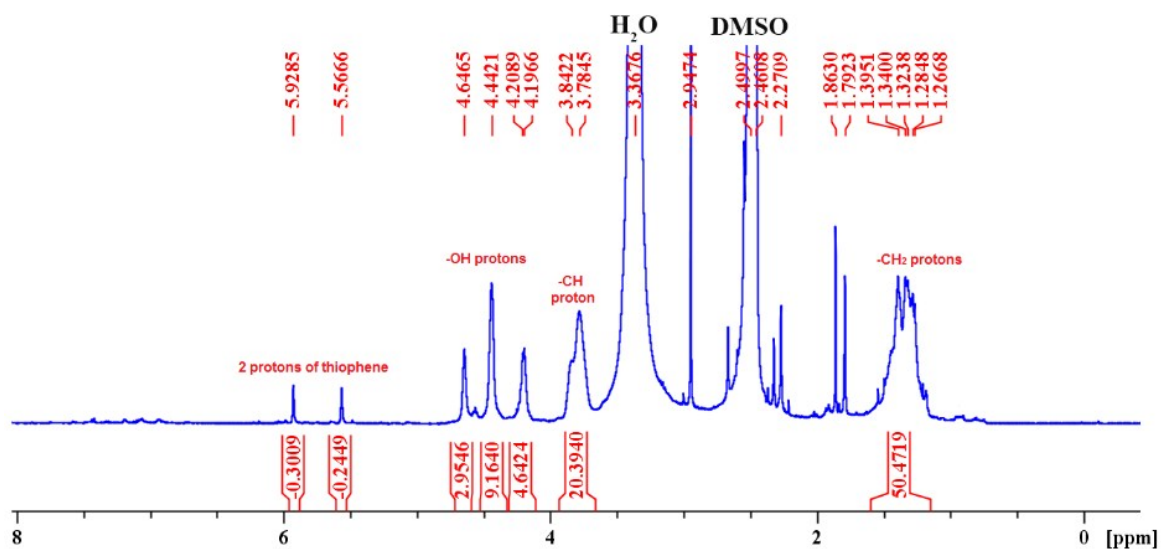

**Fig. S2** <sup>1</sup>H NMR spectrum of PVA-g-polythiophene

### **SEM-EDX**

EDX measurements were carried out with the help of Carl Zeiss Sigma VP using EHT 20kV. The elemental composition of all the polymers are also given in Fig. S3.

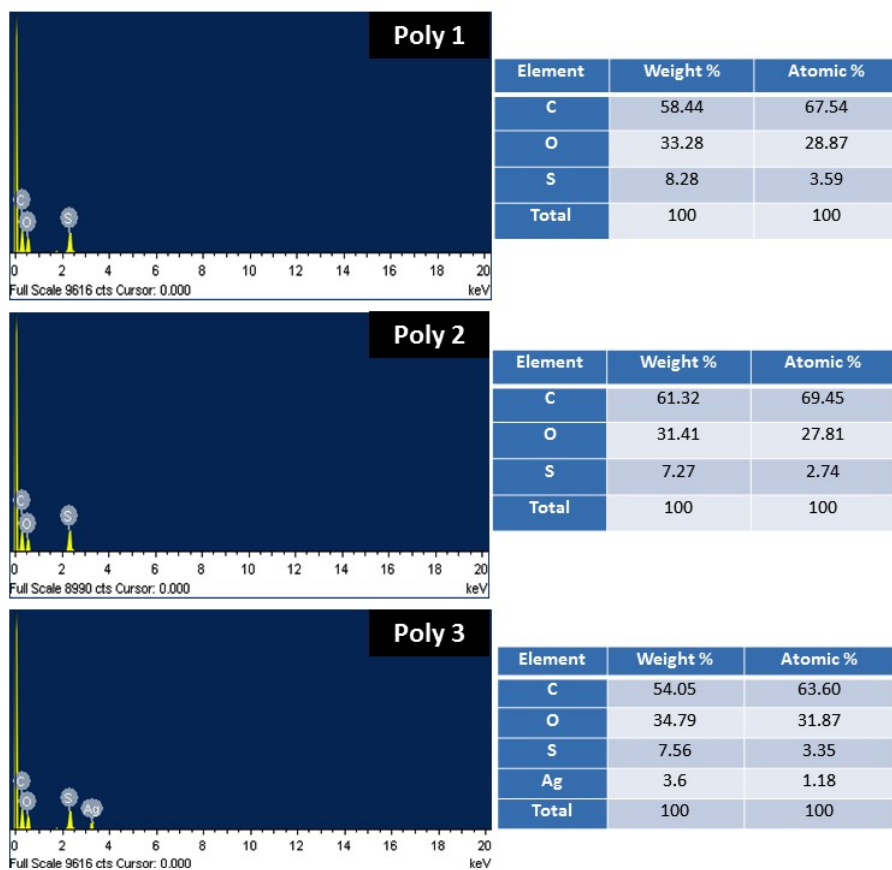

*Fig. S3 EDX spectra of the polymers*

## AFM study

The 2D and 3D AFM pictures of the polymers are given in Fig. S4.

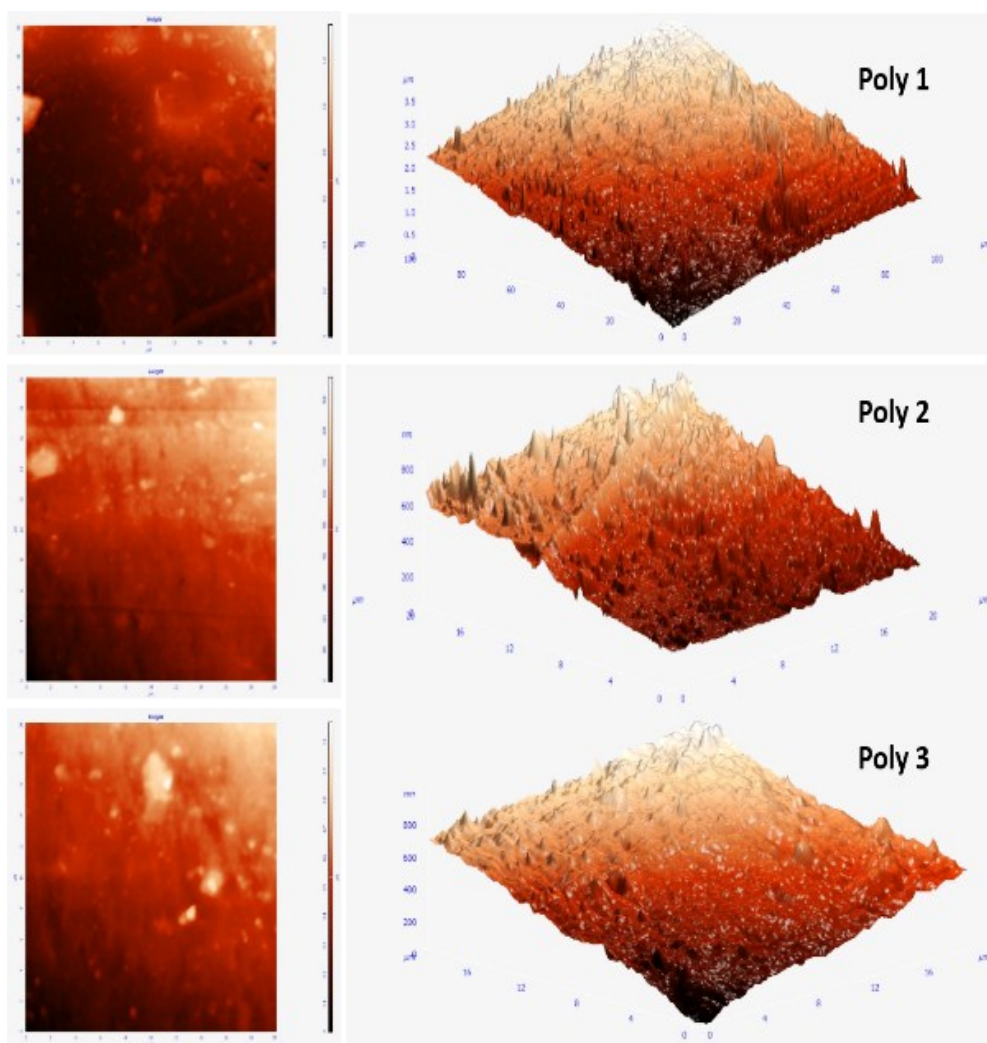

***Fig. S4 2D and 3D AFM images of the polymers***

## **UV-Vis study**

The UV-Vis spectra of the dispersed nanoparticles in ethanol were checked and compared with their respective nanocomposites as shown in Fig. S5.

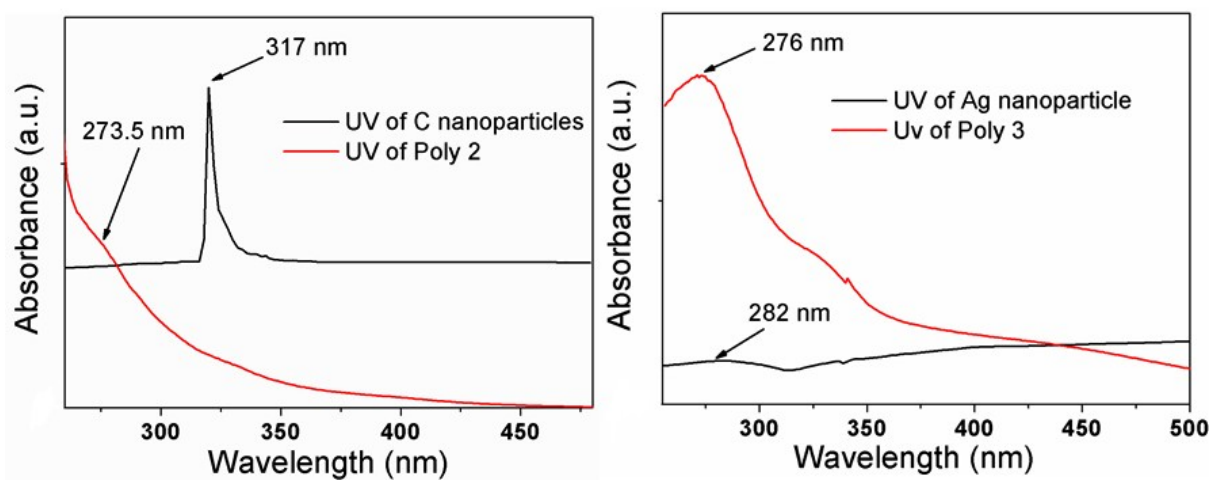

**Fig. S5** UV-vis spectrum of the nanoparticles and the nanocomposites

### Particle size

Particle size of the dispersed carbon and silver nanoparticles in ethanol were carried out in the glass cuvette with square aperture. The particle size of the nanoparticles taken with the help of a Malvern Nano ZS90 are provided in Fig. S6. From the DLS experiments, it was observed that the particle size of the carbon and silver nanoparticles are C = 42 nm and Ag = 50 nm.

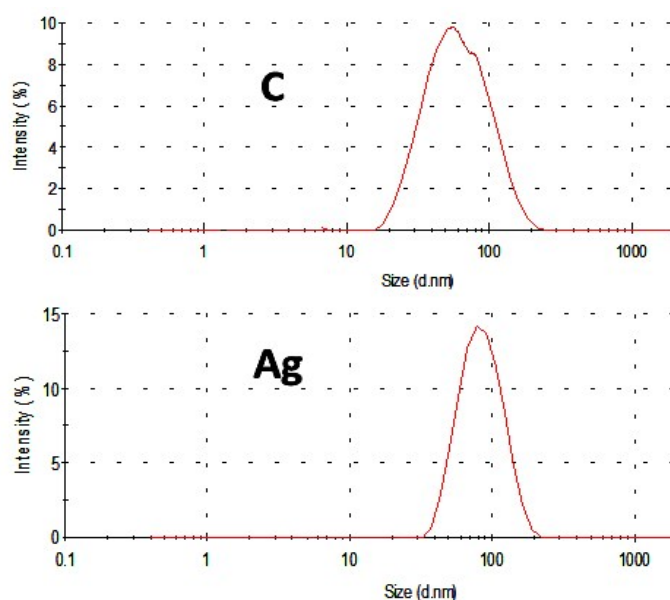

**Fig. S6** Particle size of carbon and silver nanopowders

### PL plots

The fluorescence quenching studies of the polymers in presence of 1,4-dinitrobenzene (DNB), nitrobenzene (NB), 3,5-dinitrosalicylic acid (DNSA), 2-nitrophenol (2-NP) and 4-nitrophenol (4-NP) is shown in Fig. S7.

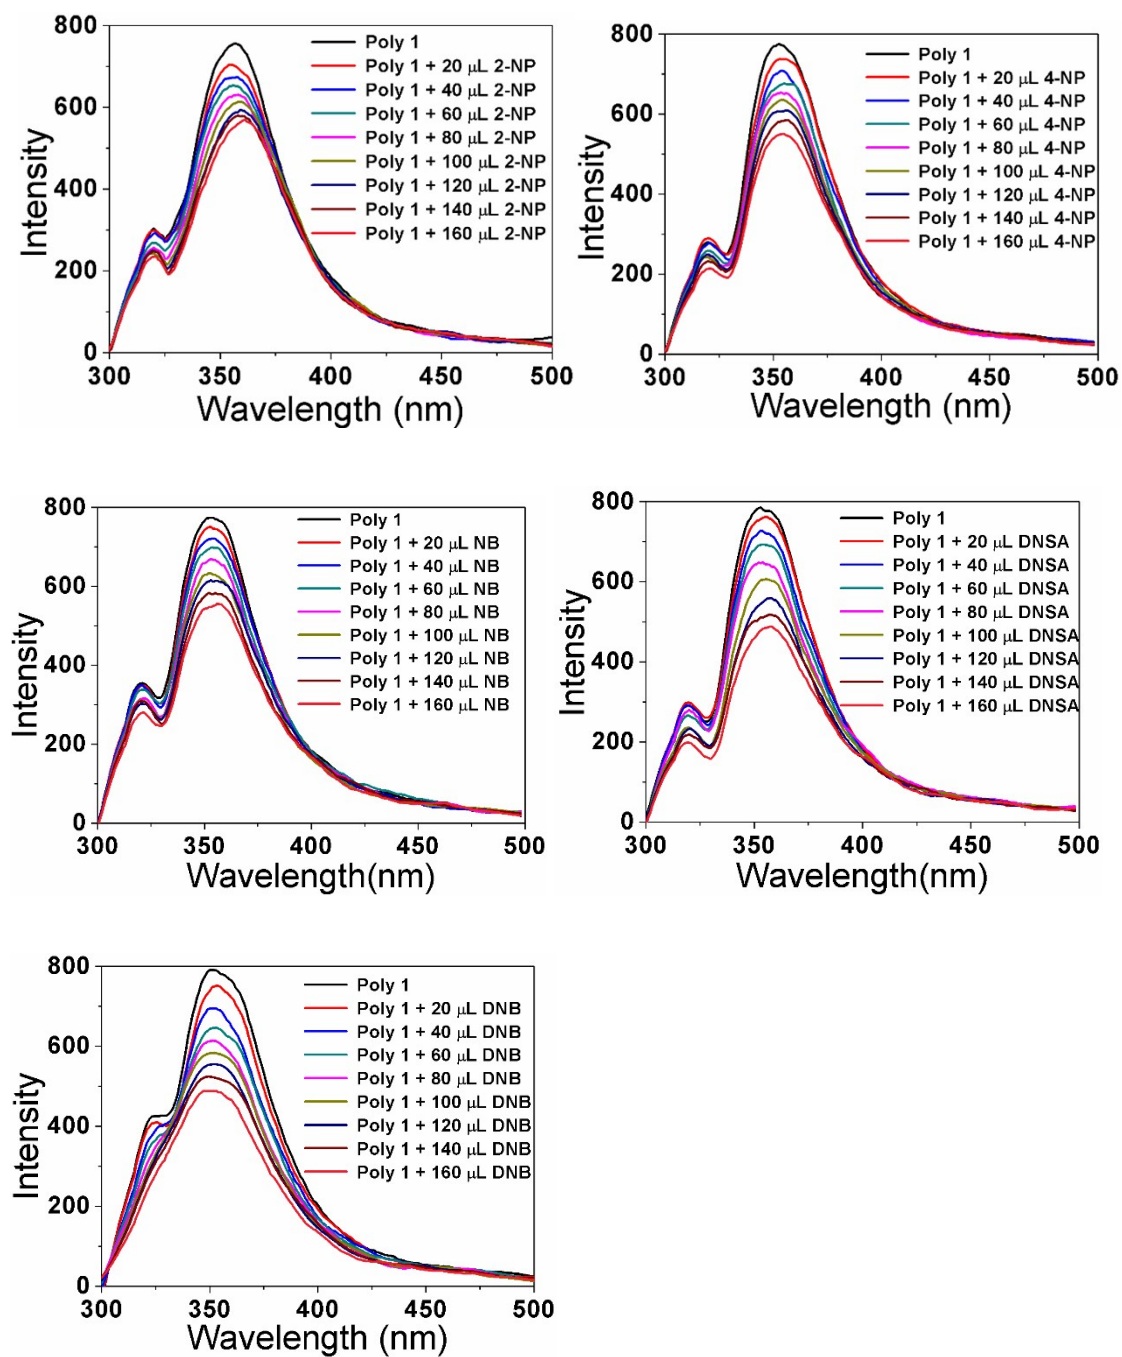



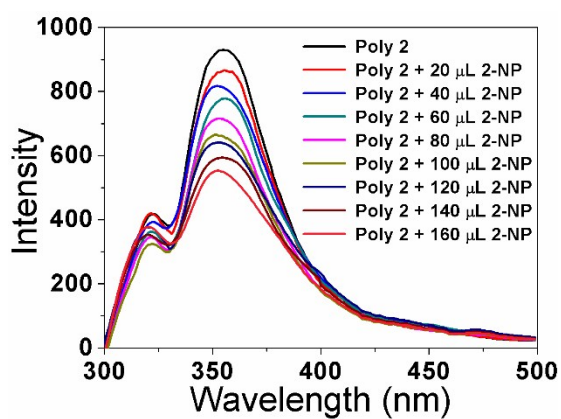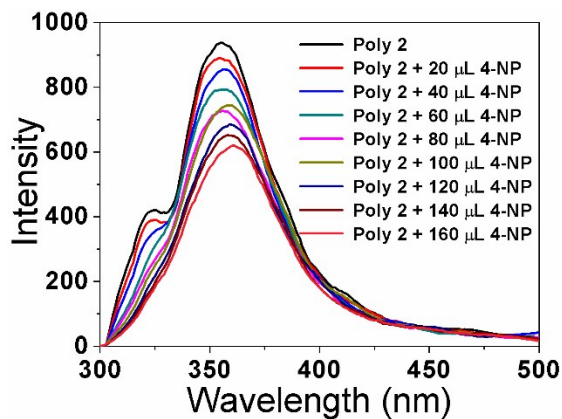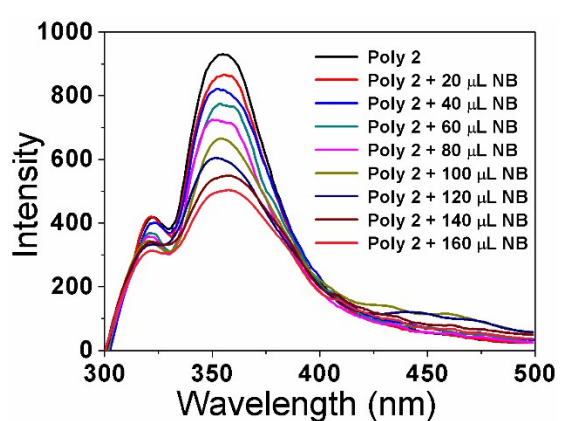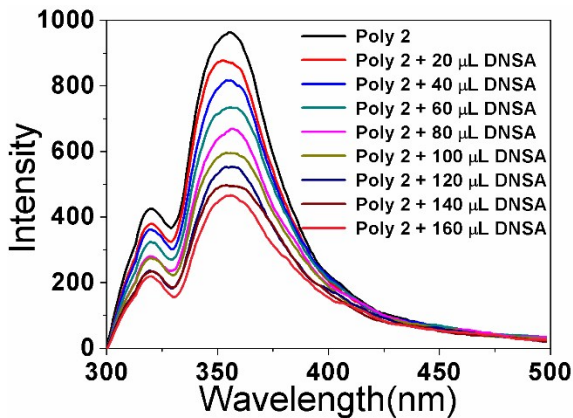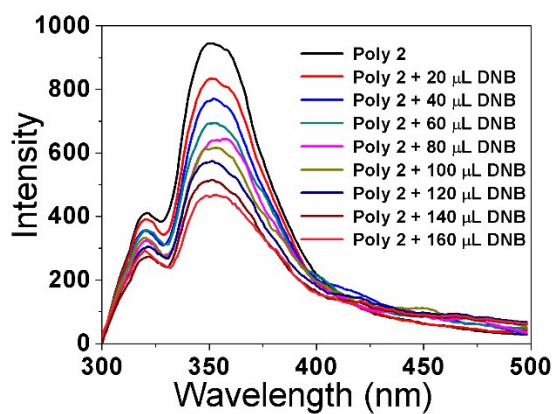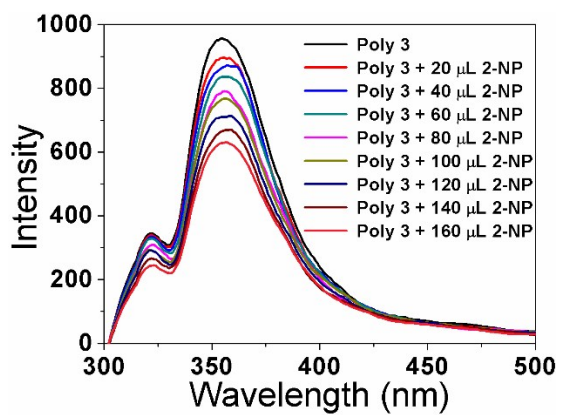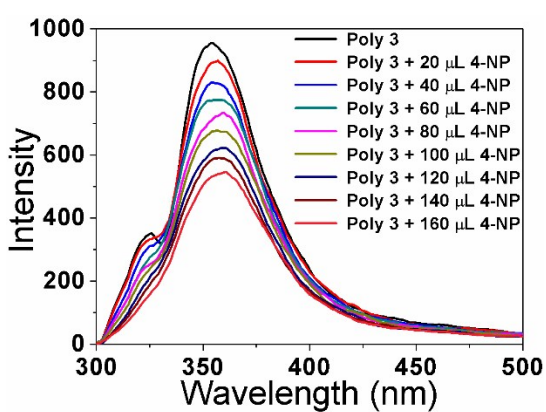

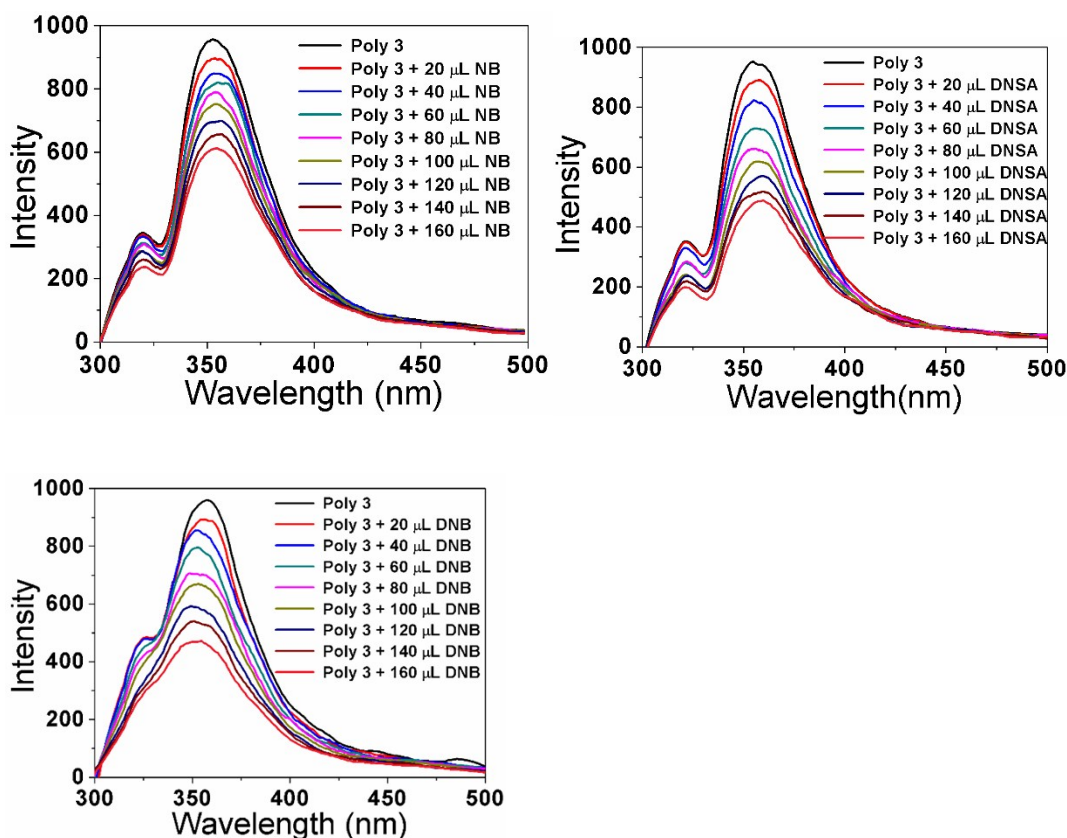

**Fig. S7** PL spectra of the polymers in presence of other nitroaromatic compounds.

### Interference study

The interference of some common organic solvents (DMSO, ethanol, acetone), compounds with electron withdrawing groups (chloroform, iso-propanol, acrylonitrile, benzoic acid) nitroaromatic compounds (nitrobenzene and nitrophenols) and other organic analytes in the PL quenching of the polymers with PA and TNT was monitored. The results as shown in Fig. S8 A and B clearly shows that the interference of all these compounds in the PL quenching studies is negligible.



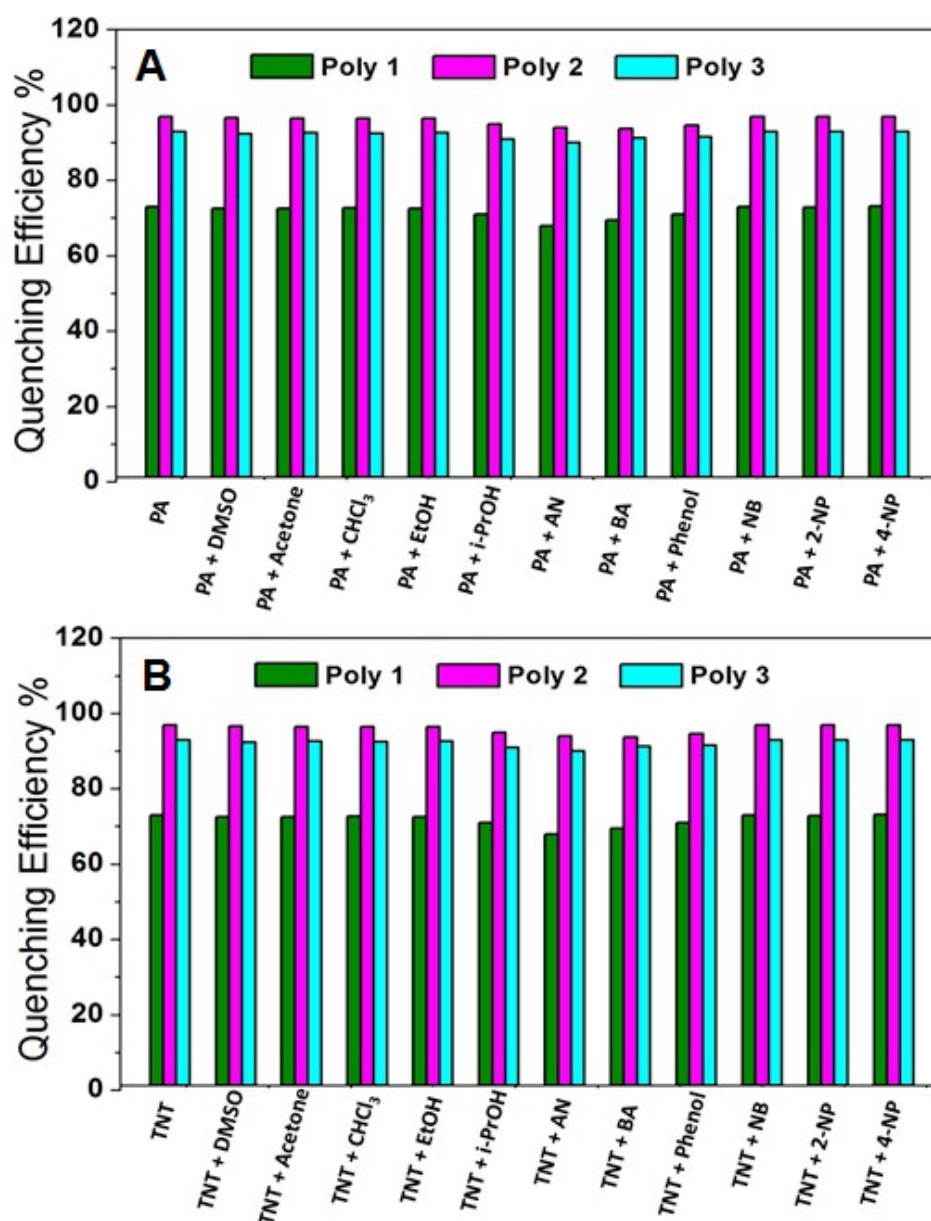

**Fig. S8** Interference study of the polymers in presence of (A) PA and (B) TNT.

Fig. S9 shows the PL quenching rates of the polymers in presence of different analytes. For Poly 2 and Poly 3, the PL quenching rates are significantly faster for PA and TNT compared to other nitroaromatics.

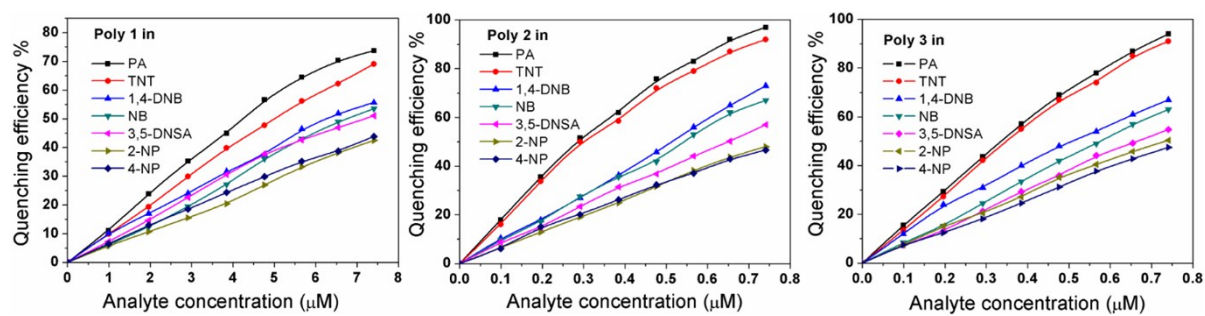

**Fig. S9** Quenching efficiency vs analyte concentration.

## TRPL study:

The time-resolved photoluminescence quenching of the polymers in presence of PA and TNT are given in Fig. S10.

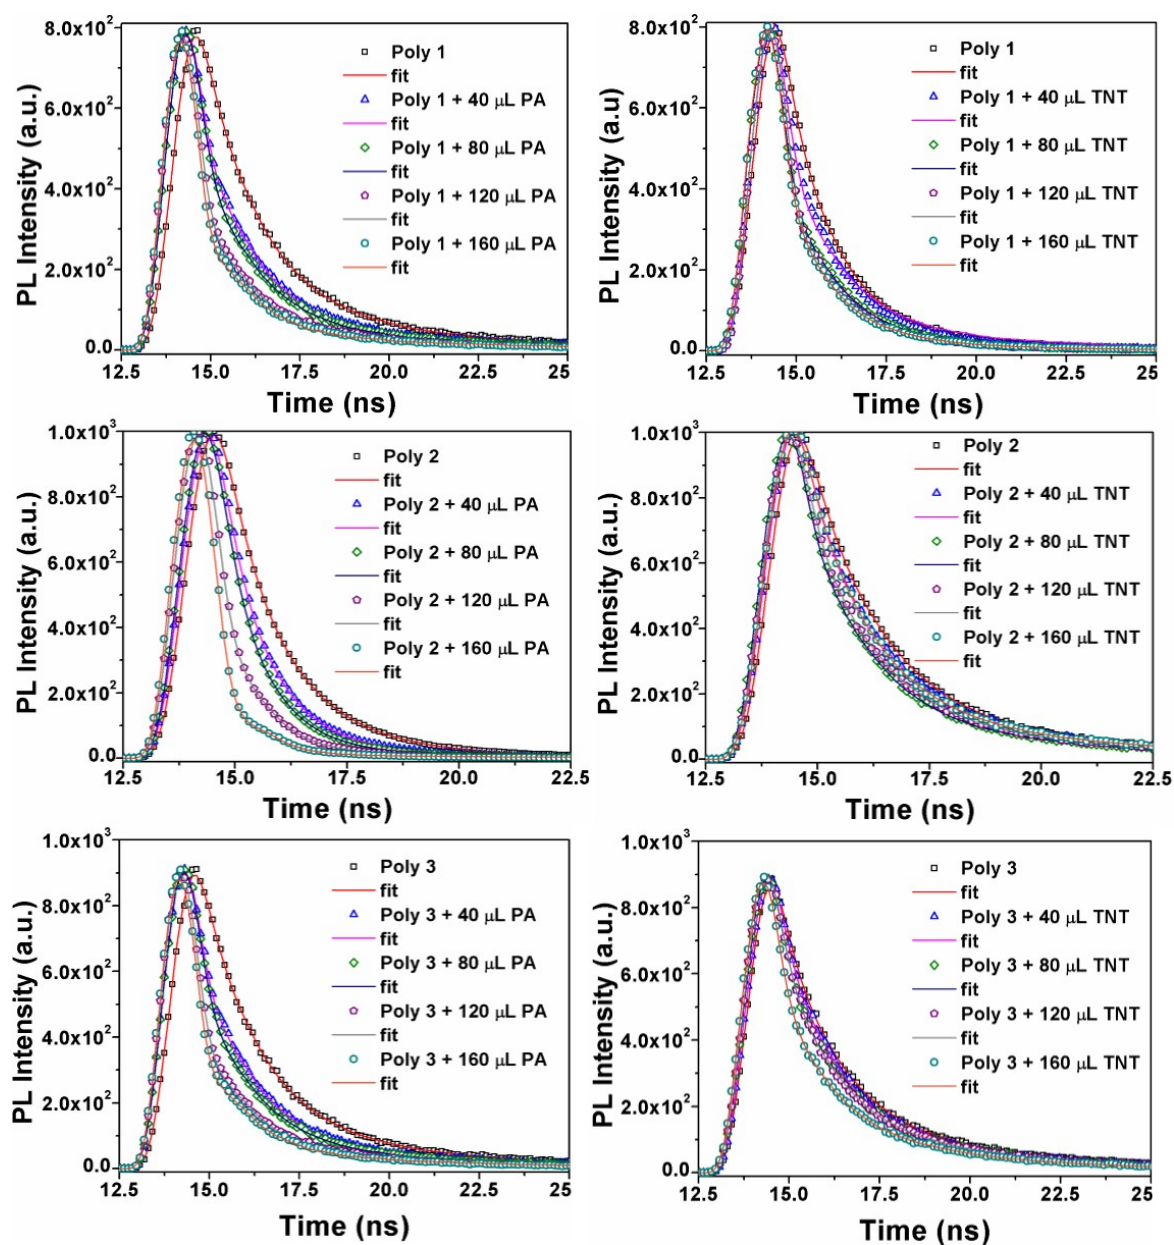

*Fig S10 Time resolved fluorescence plots of the polymers in presence of PA and TNT.*

### Cyclic Voltammetry plots

CV plots of the polymers and that of the polymers in presence of PA are shown in Fig. S11.

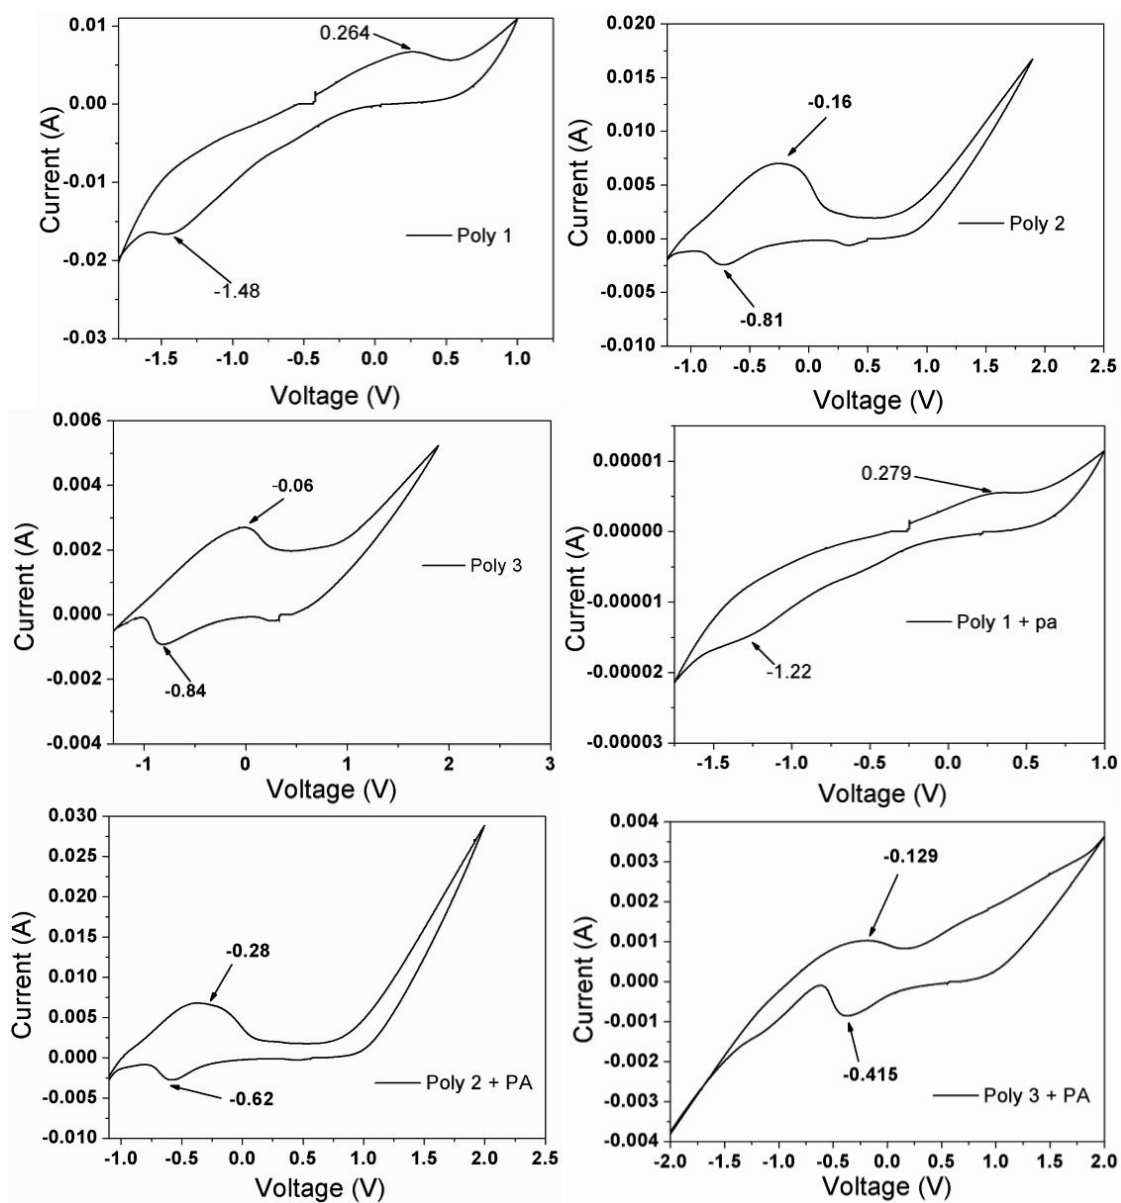

**Fig S11** CV plots of the polymers in absence and in presence of PA

## Zeta Potential plots

Zeta potential plots of the polymers in absence and in presence of PA are given in Fig. S12 below.

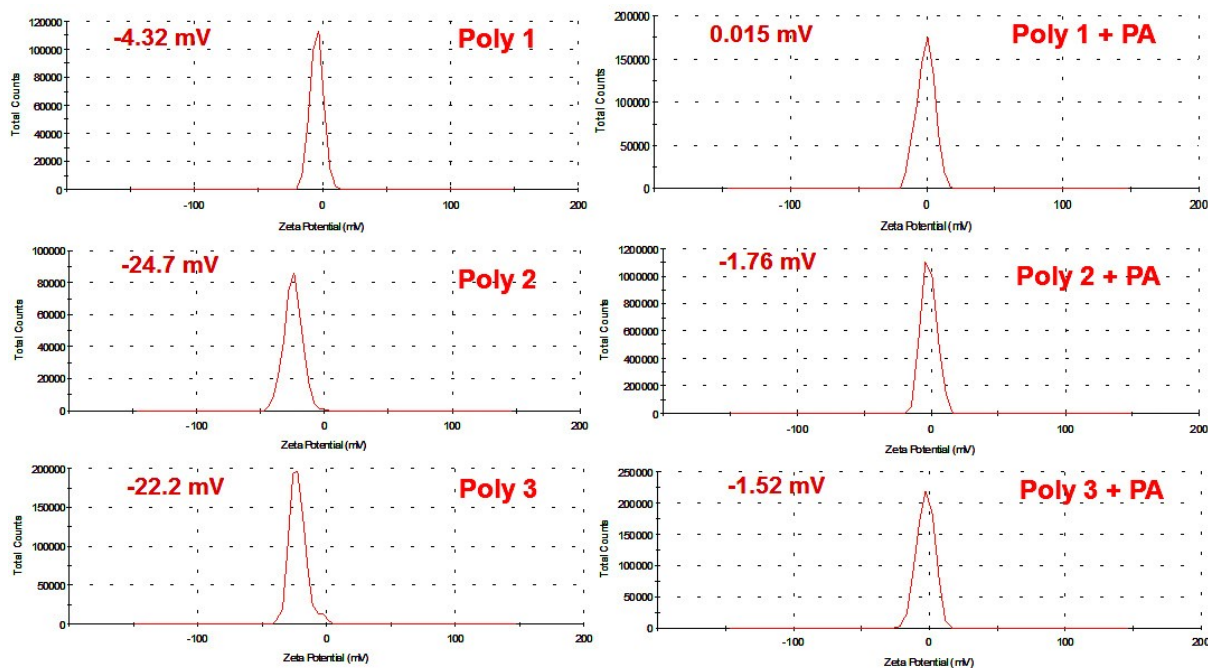

**Fig S12** Zeta potential plots of the polymers in absence and in presence of PA

### Comparative analysis of our work with earlier reported works

**Table S1:** Comparative values of LODs of Poly 2 and Poly 3 with previous reported sensors:

| Sl. no. | Sensor systems                                           | LOD for PA             | LOD for TNT          | Ref. |
|---------|----------------------------------------------------------|------------------------|----------------------|------|
| 1.      | Cationic bispyrene fluorophore, Py-dilM-Py               | $1 \times 10^{-6}$ M   | -                    | 2    |
| 2.      | Eu(III) based metal organic frameworks                   | $1 \times 10^{-7}$ M   | -                    | 3    |
| 3.      | Self-assembled pentacenequinone derivative               | $3.5 \times 10^{-7}$ M | -                    | 4    |
| 4.      | Conjugated polymer grafted silica nanoparticles          | -                      | $1 \times 10^{-6}$ M | 5    |
| 5.      | Fluorescent labelled molecularly imprinted polymer (MIP) | -                      | $4 \times 10^{-7}$ M | 6    |
| 6.      | Sodium dodecyl sulfate (SDS)                             | 1 $\mu$ M              | -                    | 7    |
| 7.      | Functionalized reduced graphene oxide                    | 125 ppb                | -                    | 8    |
| 8.      | DNSA-SQ                                                  | 70 nM                  | -                    | 9    |
| 9.      | N- rich carbon nanodots                                  | -                      | 1 nM                 | 10   |

|     |                                   |               |                |                     |
|-----|-----------------------------------|---------------|----------------|---------------------|
| 10. | BSA Au nanoclusters               | -             | 10 nM          | 11                  |
| 11. | Isobenzotriazolophanes            | 19 ppm        | -              | 12                  |
| 12. | Tripyrenyltruxene                 | 0.15 ppm      | -              | 13                  |
| 13. | Phosphole Oxide                   | 2.03 mM       | -              | 14                  |
| 14. | <b>PVA-g-PTh-C nanocomposite</b>  | <b>4.6 nM</b> | <b>5.8 nM</b>  | <b>(Our system)</b> |
| 15. | <b>PVA-g-PTh-Ag nanocomposite</b> | <b>6.5 nM</b> | <b>7.35 nM</b> | <b>(Our system)</b> |

**Table S2: t-test results of the polymers with PA**

**A. For Poly 1 with 5  $\mu$ M PA**

Independent t-test on col (B) and col (C)

| <b>Data</b> | <b>N</b> | <b>Mean</b> | <b>Standard Deviation</b> |
|-------------|----------|-------------|---------------------------|
| <b>B</b>    | 199      | 145.36      | 106.67                    |
| <b>C</b>    | 199      | 145.37      | 106.67                    |

$t = 0.109$  and  $p = 0.913$

At the 0.05 level, the two means are NOT significantly different.

Independent t-test on col (C) and col (D)

| <b>Data</b> | <b>N</b> | <b>Mean</b> | <b>Standard Deviation</b> |
|-------------|----------|-------------|---------------------------|
| <b>C</b>    | 199      | 145.37      | 106.67                    |
| <b>D</b>    | 199      | 145.36      | 106.68                    |

$t = 0.429$  and  $p = 0.668$

At the 0.05 level, the two means are NOT significantly different.

Independent t-test on col (B) and col (D)

| <b>Data</b> | <b>N</b> | <b>Mean</b> | <b>Standard Deviation</b> |
|-------------|----------|-------------|---------------------------|
| <b>B</b>    | 199      | 145.37      | 106.67                    |
| <b>C</b>    | 199      | 145.38      | 106.68                    |

$t = 0.59$  and  $p = 0.56$



At the 0.05 level, the two means are NOT significantly different.

### **B. For Poly 2 with 0.5 $\mu$ M PA**

Independent t-test on col (B) and col (C)

| <b>Data</b> | <b>N</b> | <b>Mean</b> | <b>Standard Deviation</b> |
|-------------|----------|-------------|---------------------------|
| <b>B</b>    | 199      | 91.57       | 66.46                     |
| <b>C</b>    | 199      | 91.56       | 66.46                     |

t = 0.162 and p = 0.87

At the 0.05 level, the two means are NOT significantly different.

Independent t-test on col (C) and col (D)

| <b>Data</b> | <b>N</b> | <b>Mean</b> | <b>Standard Deviation</b> |
|-------------|----------|-------------|---------------------------|
| <b>C</b>    | 199      | 91.57       | 66.45                     |
| <b>D</b>    | 199      | 91.56       | 66.46                     |

t = 0.147 and p = 0.88

At the 0.05 level, the two means are NOT significantly different.

Independent t-test on col (B) and col (D)

| <b>Data</b> | <b>N</b> | <b>Mean</b> | <b>Standard Deviation</b> |
|-------------|----------|-------------|---------------------------|
| <b>B</b>    | 199      | 91.57       | 66.46                     |
| <b>C</b>    | 199      | 91.56       | 66.45                     |

t = 0.38 and p = 0.71

At the 0.05 level, the two means are NOT significantly different.

### **C. For Poly 3 with 0.5 $\mu$ M PA**

Independent t-test on col (B) and col (C)

| <b>Data</b> | <b>N</b> | <b>Mean</b> | <b>Standard Deviation</b> |
|-------------|----------|-------------|---------------------------|
| <b>B</b>    | 200      | 114.68      | 83.24                     |
| <b>C</b>    | 200      | 114.67      | 83.25                     |

t = 0.34 and p = 0.73

At the 0.05 level, the two means are NOT significantly different.

Independent t-test on col (C) and col (D)

| <b>Data</b> | <b>N</b> | <b>Mean</b> | <b>Standard Deviation</b> |
|-------------|----------|-------------|---------------------------|
| <b>C</b>    | 200      | 114.68      | 83.24                     |
| <b>D</b>    | 200      | 114.67      | 83.25                     |

$t = 0.41$  and  $p = 0.68$

At the 0.05 level, the two means are NOT significantly different.

Independent t-test on col (B) and col (D)

| <b>Data</b> | <b>N</b> | <b>Mean</b> | <b>Standard Deviation</b> |
|-------------|----------|-------------|---------------------------|
| <b>B</b>    | 200      | 114.68      | 83.24                     |
| <b>C</b>    | 200      | 114.67      | 83.23                     |

$t = 0.58$  and  $p = 0.61$

At the 0.05 level, the two means are NOT significantly different.

## References

- 1 D. Pavia, G. M. Lampman, G. S. Kriz, Introduction to Spectroscopy, 2001, **3**, 41.
- 2 L. Ding, Y. Bai, Y. Cao, G. Ren, G. J. Blanchard, Y. Fang, *Langmuir*, 2014, **30**, 7645–7653.
- 3 X. H. Zhou, L. Li, H. H. Li, A. Li, T. Yang, W. Huang, *Dalton Trans.*, 2013, **42**, 12403-12409.
- 4 V. Bhalla, A. Gupta, M. Kumar, D. S. S. Rao, S. K. Prasad, *ACS Appl. Mater. Interfaces*, 2013, **5**, 672–679.
- 5 J. Feng, Y. Li, M. Yang, *Sensors and Actuators B: Chemical*, 2010, **145**, 438–443.
- 6 R. C. Stringer, S. Gangopadhyay, S. A. Grant, *Anal. Chem.* 2010, **82**, 4015–4019.
- 7 L. Ding, Y. Bai, Y. Cao, G. Ren, G. J. Blanchard, Y. Fang, *Langmuir* 2014, **30**, 7645–7653.
- 8 D. Dinda, A. Gupta, B. K. Shaw, S. Sadhu, S. K. Saha, *ACS Appl. Mater. Interfaces*, 2014, **6**, 10722–10728.

- 9 Y. Xu, B. Li, W. Li, J. Zhao, S. Sun, Y. Pang, *Chem. Commun.* 2013, **49**, 4764—4766.
- 10 L. Zhang, Y. Han, J. Zhu, Y. Zhai, S. Dong, *Anal. Chem*, 2015, **87**, 2033-2036.
- 11 X. Yang, J. Wang, D. Su, Q. Xia, F. Chai, C. Wang, F. Qu, *Dalton Trans.*, 2014, **43**, 10057–10063.
- 12 N. Venkatesan, V. Singh, P. Rajakumar, A. K. Mishra, *R. Soc. Chem. Adv.*, 2014, **4**, 53484–53489.
- 13 P. Samang, D. Raksasorn, O. Sukwattanasinitt, P. A. Rashatasakhon, *R. Soc. Chem. Adv.*, 2014, **4**, 58077–58082.
- 14 K. Shiraishi, T. Sanji, M. Tanaka, *ACS Appl. Mater. Interfaces*, 2009, **7**, 1379–1382.
